# Supplementary material
Source: MDPI journal article supplement (https://www.mdpi.com/2073-4344/13/7/1116)
Supplement: s1 [file s1]

## Supporting Information

# Facile Synthesis of Silicon-Based Materials Modified using Zinc(II) 2-Bromoacetic as Heterogeneous Catalyst for the Fixation of CO<sub>2</sub> into Cyclic Carbonates

Chaokun Yang <sup>1</sup>, Xiangning Ma <sup>2</sup>, Meng Li <sup>3</sup>, Tuantuan Yang <sup>1</sup> and Xin Zhao <sup>1,\*</sup>

<sup>1</sup> Discipline Construction Office, Civil Aviation Flight University of China, Guanghan 618307, China

<sup>2</sup> Marine College, Shandong University, Weihai 264209, China

<sup>3</sup> College of Aviation Engineering, Civil Aviation Flight University of China, Guanghan 618307, China

\* Correspondence: zhaox@cafuc.edu.cn

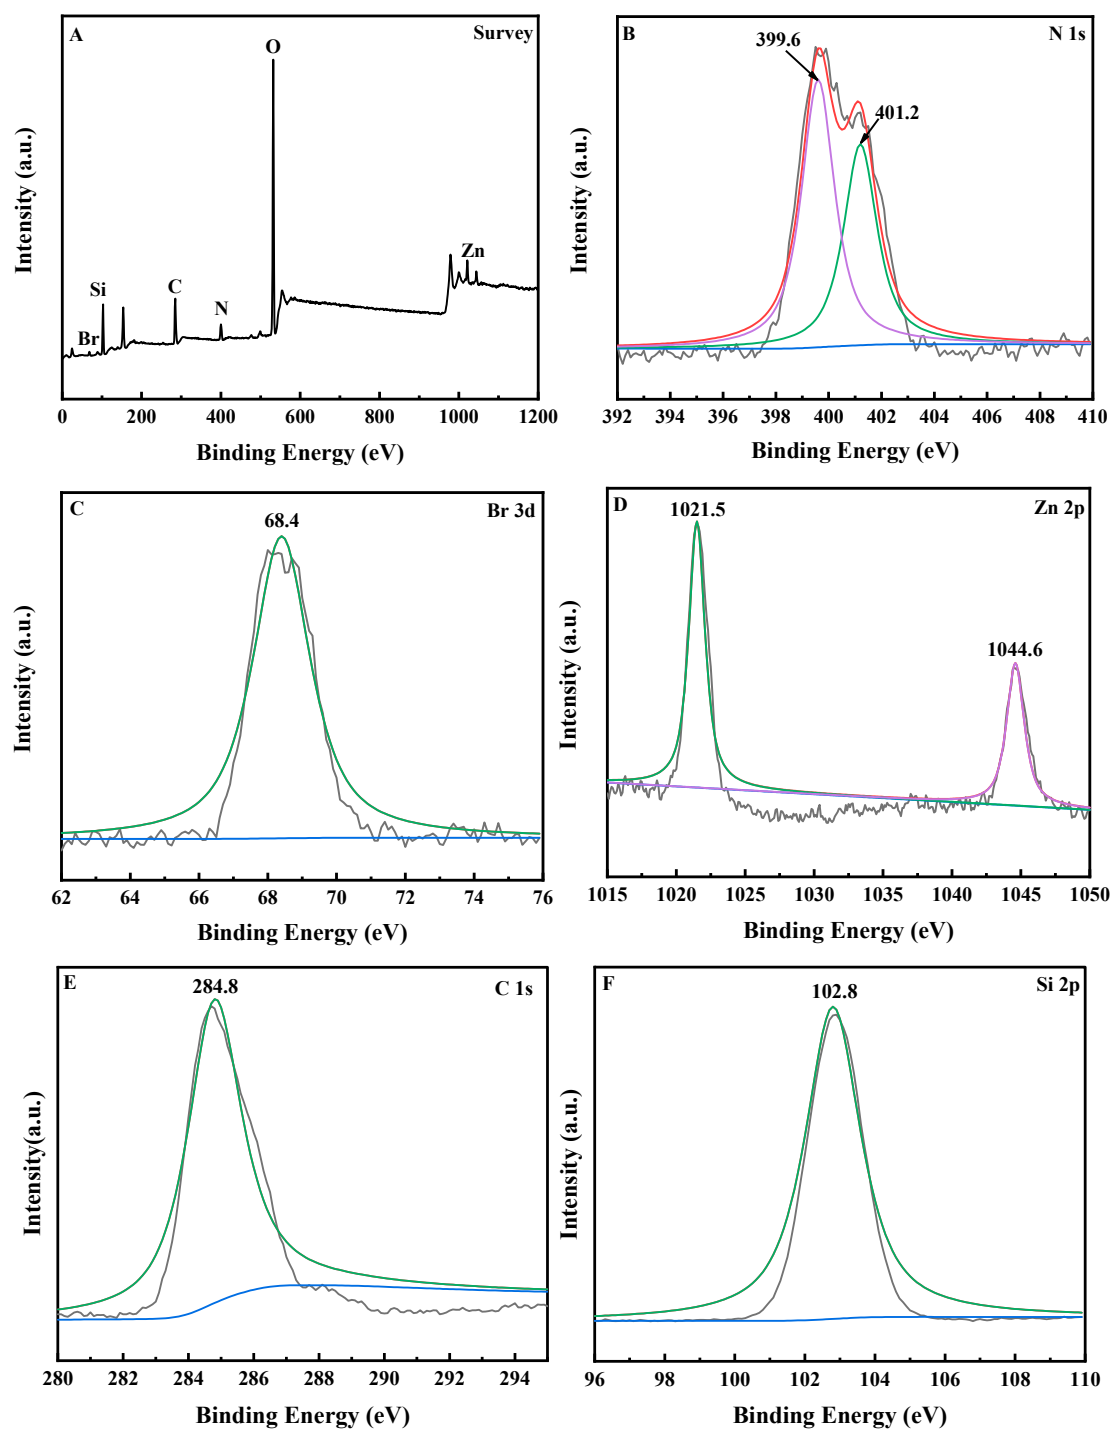

**Figure S1.** (A) Full spectrum; (B) N 1s XPS spectra; (C) Br 3d XPS spectra; (D) Zn 2p XPS spectra; (E) C 1s XPS spectra and (F) Si 2p XPS spectra of Si-ZnBA-2.

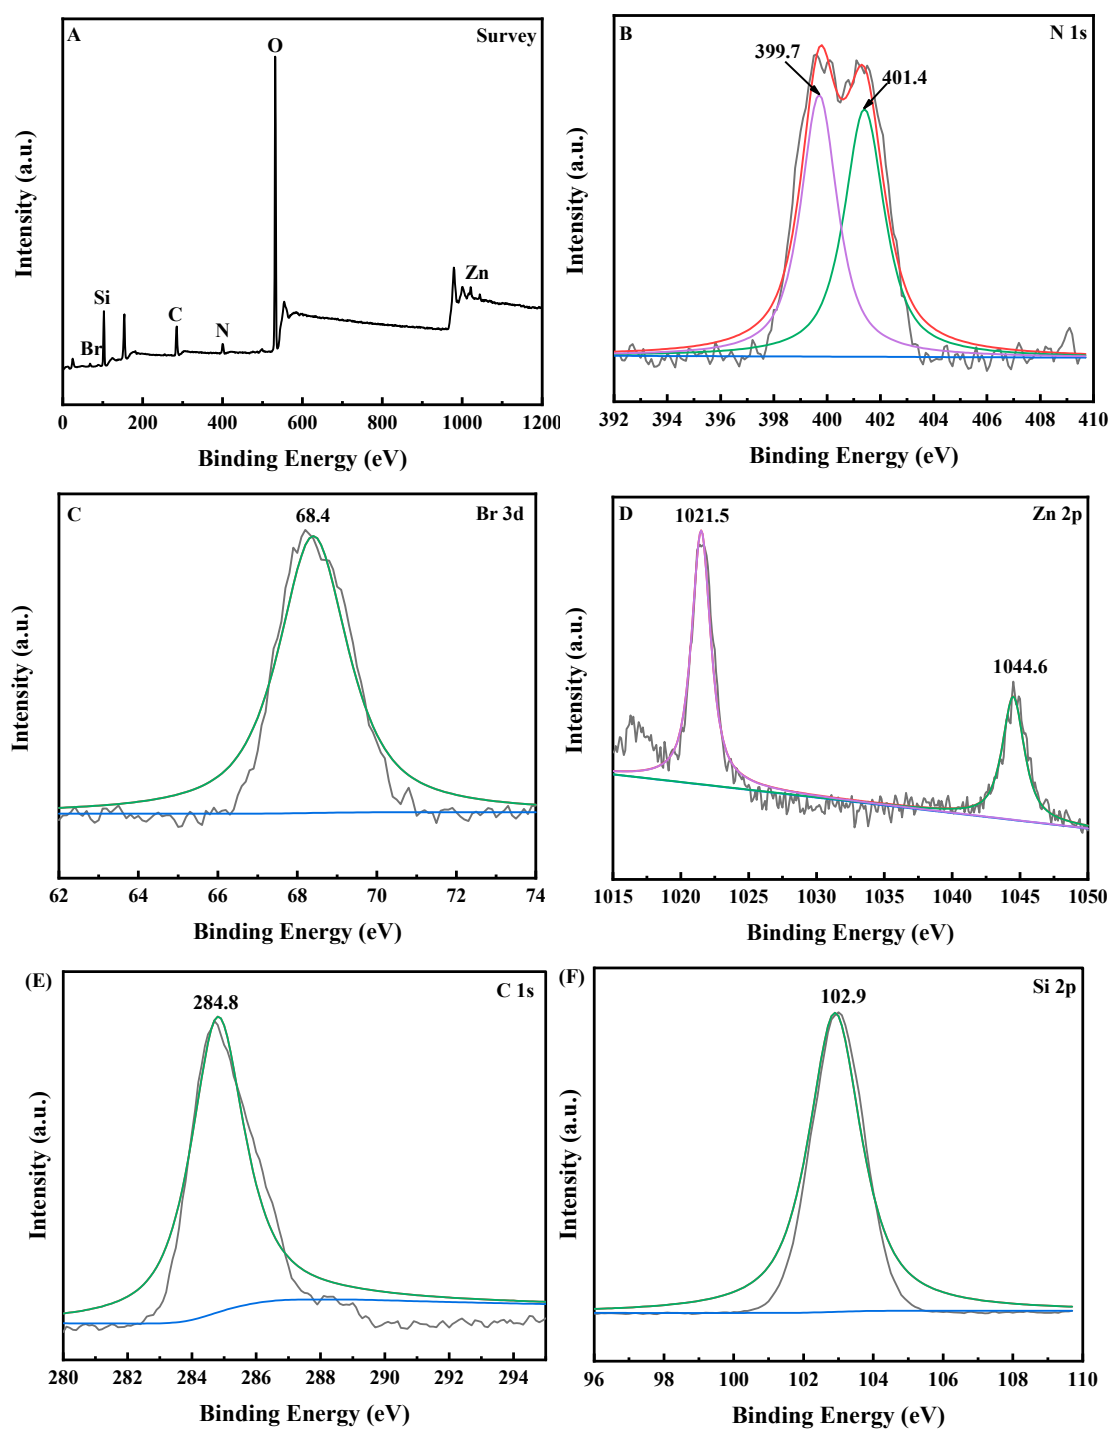

**Figure S2.** (A) Full spectrum; (B) N 1s XPS spectra; (C) Br 3d XPS spectra; (D) Zn 2p XPS spectra; (E) C 1s XPS spectra and (F) Si 2p XPS spectra of Si-ZnBA-3.

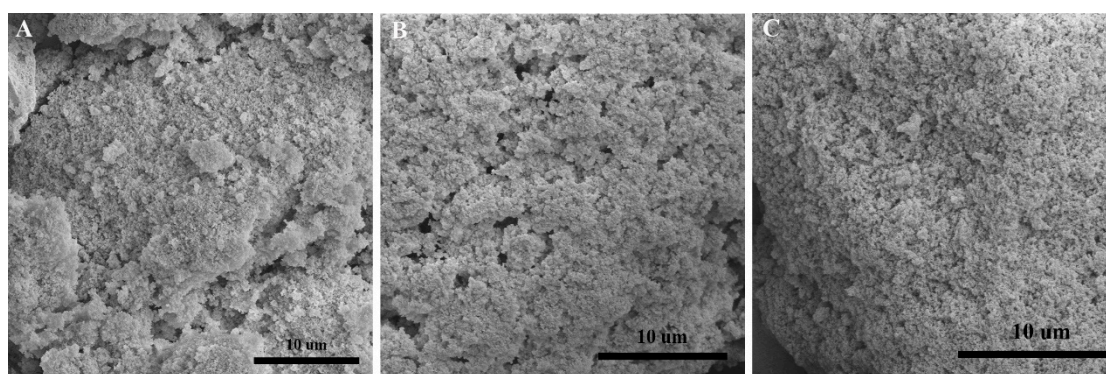

**Figure S3.** SEM images of (A) Si-ZnBA-1; (B) Si-ZnBA-2; (3) Si-ZnBA-3.

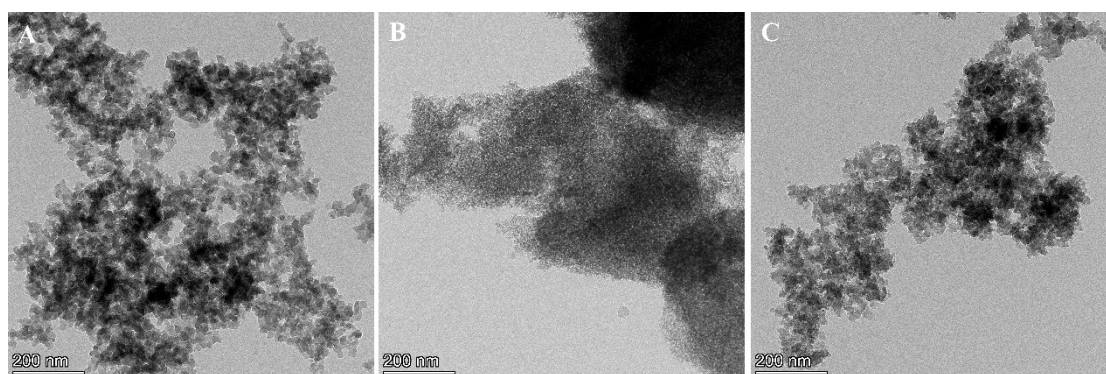

**Figure S4.** TEM images of (A) Si-ZnBA-1; (B) Si-ZnBA-2; (3) Si-ZnBA-3.

## Catalyst Performance Discussion

**Table S1.** Screening of catalyst <sup>a</sup>.

| Entry | Catalyst  | cocatalyst | Reaction results <sup>b</sup> |                |
|-------|-----------|------------|-------------------------------|----------------|
|       |           |            | Yield /%                      | Selectivity /% |
| 1     | Si-ZnBA-2 | KI         | 71                            | ≥99            |
| 2     | Si-ZnBA-2 | KBr        | 13                            | ≥98            |
| 3     | Si-ZnBA-2 | KCl        | trace                         | —              |
| 4     | Si-ZnBA-2 | TBAI       | 44                            | ≥99            |
| 5     | Si-ZnBA-2 | TBAB       | 24                            | ≥99            |
| 6     | Si-ZnBA-3 | KI         | 59                            | ≥99            |
| 7     | Si-ZnBA-3 | KBr        | 8                             | ≥99            |
| 8     | Si-ZnBA-3 | KCl        | trace                         | —              |
| 9     | Si-ZnBA-3 | TBAI       | 40                            | ≥99            |
| 10    | Si-ZnBA-3 | TBAB       | 24                            | ≥99            |

<sup>a</sup> Reaction conditions: PO 34.5 mmol, 130 °C, 2.0 MPa, 5 h, Si-ZnBA-n 150 mg, co-catalyst 100 mg; <sup>b</sup> PC yield, PC selectivity all based on GC.

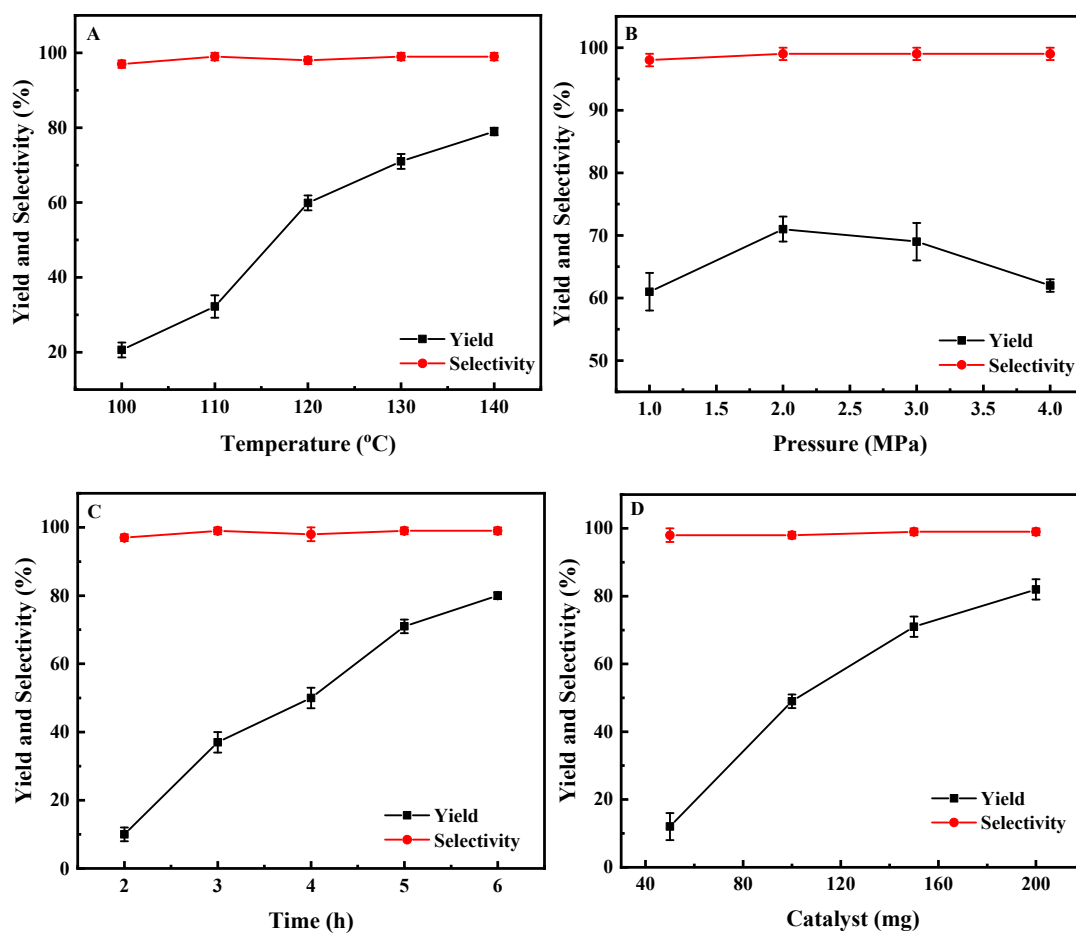

**Figure S5.** Effects of reaction conditions on PC synthesis. Reaction conditions: PO 34.5 mmol, KI 0.54 mmol, (A) Si-ZnBA-2 150 mg, 2.0 MPa, 5.0 h; (B) Si-ZnBA-2 150 mg, 130 °C, 5.0 h; (C) Si-ZnBA-2 150 mg, 130 °C, 2.0 MPa; (D) 130 °C, 2.0 MPa, 5.0 h.

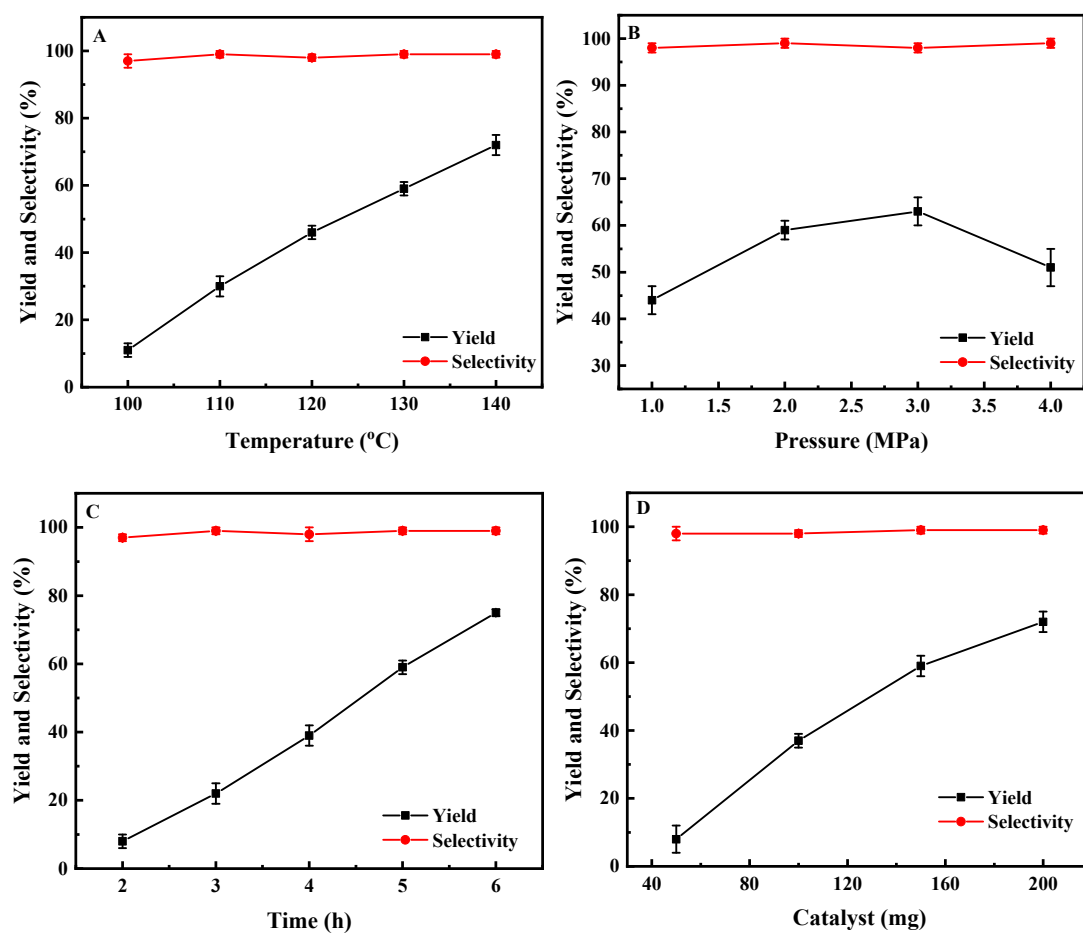

**Figure S6.** Effects of reaction conditions on PC synthesis. Reaction conditions: PO 34.5 mmol, KI 0.54 mmol, (A) Si-ZnBA-3 150 mg, 2.0 MPa, 5.0 h; (B) Si-ZnBA-2 150 mg, 130 °C, 5.0 h; (C) Si-ZnBA-3 150 mg, 130 °C, 2.0 MPa; (D) 130 °C, 2.0 MPa, 5.0 h.
